# Supplementary material for: Relative Dose Intensity of Chemotherapy and Survival in Patients with Advanced Stage Solid Tumor Cancer: A Systematic Review and Meta‐Analysis
Source: PubMed Central journal article supplement — Oncologist. 2021 Jun 9;26(9):e1609–18. doi: 10.1002/onco.13822 (PMC8417866; doi:10.1002/onco.13822), 2021-06-09
Supplement: ONCO-26-e1609-s001.pdf [file ONCO-26-e1609-s001.pdf]

Supplemental Tables for:

"Relative Dose Intensity of Chemotherapy and Survival in Advanced Stage Solid Tumor Cancer Patients: A Systematic Review and Meta-Analysis"

Carrie M Nielson et al.

**Table S1:** Detailed search strategy

| Database       | PubMed                                                                                                                                                                                                                                                                                                                                                                  | Embase                                                                                                                                                                                                                                                            | Web of Science                                                                                                                                                                     |
|----------------|-------------------------------------------------------------------------------------------------------------------------------------------------------------------------------------------------------------------------------------------------------------------------------------------------------------------------------------------------------------------------|-------------------------------------------------------------------------------------------------------------------------------------------------------------------------------------------------------------------------------------------------------------------|------------------------------------------------------------------------------------------------------------------------------------------------------------------------------------|
| Search String  | ("Neoplasms"[MeSH] NOT "hematologic neoplasms" [MeSH]) AND "drug therapy" [MeSH] AND "relative dose intensity" [All Fields] AND ("overall survival" [All Fields] OR "progression-free survival" [All Fields] OR "disease-free survival" [MeSH] OR "recurrence-free survival" [All Fields] OR "survival" [MeSH] OR "survival analysis" [MeSH] OR "survival rate" [MeSH]) | (('neoplas*/exp OR 'cancer'/exp OR 'malignan*/exp) NOT 'hematologic malinan*/exp) AND ('relative dose intensity') AND ('overall survival'/exp OR 'progression-free survival'/exp OR 'disease-free survival'/exp OR 'recurrence-free survival'/exp OR surviv*/exp) | (neoplas* OR cancer OR malignan*) AND ("relative dose intensity") AND (overall survival OR progression-free survival OR disease-free survival OR relapse-free survival OR surviv*) |
| Filters        | English language only                                                                                                                                                                                                                                                                                                                                                   | English language only                                                                                                                                                                                                                                             | English language only                                                                                                                                                              |
| Date Searched  | 07/02/2020                                                                                                                                                                                                                                                                                                                                                              | 07/02/2020                                                                                                                                                                                                                                                        | 07/02/2020                                                                                                                                                                         |
| Number of Hits | 263                                                                                                                                                                                                                                                                                                                                                                     | 835                                                                                                                                                                                                                                                               | 344                                                                                                                                                                                |

Supplemental Tables for:

"Relative Dose Intensity of Chemotherapy and Survival in Advanced Stage Solid Tumor Cancer Patients: A Systematic Review and Meta-Analysis"

Carrie M Nielson et al.

**Table S2:** Studies of taxane- and gemcitabine-based chemotherapy regimens

| Author (Year)             | Tumor Type | Chemotherapy Regimen                               | Patient N | RDI Comparison      | OS                                                                             | PFS                                                                             |
|---------------------------|------------|----------------------------------------------------|-----------|---------------------|--------------------------------------------------------------------------------|---------------------------------------------------------------------------------|
| Fernández (2018) [19]     | Pancreas   | Nab-paclitaxel, gemcitabine                        | 210       | <85% vs. ≥85%       | $p = 0.754$<br>in favor of<br>RDI <85%<br>(median OS<br>7.2 vs. 7.0<br>months) | $p = 0.704$<br>in favor of<br>RDI ≥85%<br>(median PFS<br>5.0 vs. 5.2<br>months) |
| Perez-Fidalgo (2014) [45] | Breast     | Anthracycline, taxane-based chemotherapy           | 231       | <85% vs. ≥85%       | $p = 0.026$<br>in favor of<br>RDI ≥85%<br>(5-year OS<br>rate 80%<br>vs. 97%)   | NR                                                                              |
| Ishimoto (2019) [30]      | Pancreas   | Nab-paclitaxel, gemcitabine                        | 27        | <63.6% vs. ≥63.6%   | $p = 0.984$                                                                    | NR                                                                              |
| Kushnir (2019) [31]       | Prostate   | Docetaxel                                          | 81        | 10% increase in RDI | HR 0.83<br>(95% CI:<br>0.72–0.96)<br>$p = 0.0117$                              | NR                                                                              |
| Kanazawa (2017) [16]      | Gastric    | Nab-paclitaxel                                     | 14        | <80% vs. ≥80%       | $p = 0.03$<br>in favor of<br>RDI ≥80%<br>(median OS<br>8.2 vs. 14.3<br>months) | $p = 0.02$<br>in favor of<br>RDI ≥80%<br>(median PFS<br>4 vs. 11.8<br>months)   |
| Ishigaki (2017) [17]      | Pancreas   | Nab-paclitaxel, gemcitabine                        | 102       | <77% vs. ≥77%       | $p = 0.1$<br>in favor of<br>RDI <77%<br>(median OS<br>410 vs. 312<br>days)     | $p = 0.33$<br>in favor of<br>RDI <77%<br>(median PFS<br>196 vs. 183<br>days)    |
| Saito (2017) [32]         | Pancreas   | Nab-paclitaxel, gemcitabine (first-line)           | 80        | <70% vs. ≥70%       | HR 1.70<br>(95% CI:<br>0.63–4.25)<br>$p = 0.28$                                | NR                                                                              |
|                           |            | Nab-paclitaxel, gemcitabine (refractory/recurrent) | 80        | <70% vs. ≥70%       | HR 2.44<br>(95% CI:<br>1.07–5.49)<br>$p = 0.04$                                | NR                                                                              |

Supplemental Tables for:

"Relative Dose Intensity of Chemotherapy and Survival in Advanced Stage Solid Tumor Cancer Patients: A Systematic Review and Meta-Analysis"

Carrie M Nielson et al.

| Author (Year)          | Tumor Type | Chemotherapy Regimen | Patient N | RDI Comparison   | OS | PFS                               |
|------------------------|------------|----------------------|-----------|------------------|----|-----------------------------------|
| Fukuchi (2016)<br>[27] | Gastric    | Nab-paclitaxel       | 37        | <90% vs.<br>≥90% | NR | OR 0.89<br>(95% CI:<br>0.55–1.42) |

CI, confidence interval; HR, hazard ratio; NR, not reported; OR, odds ratio; OS, overall survival; PFS, progression-free survival; RDI, relative dose intensity
